# Supplementary material for: Seasonal and Spatial Variations in Functional Genes and Microbial Community of Feammox and Its Associated Processes in Urban Green Heart Soil
Source: MDPI journal article supplement (doi:10.3390/w15061024), 2023-03-08
Supplement: s1 [file s1]

## Supplementary Materials

**Table S1.** Seasonal and habitat information of soil samples.

| Soil type              | Winter | Spring | Summer | Autumn | Altitude(m) | Longitude and latitude  |
|------------------------|--------|--------|--------|--------|-------------|-------------------------|
| Landscape soil         | 1*     | 17     | 33     | 49     | 380         | 29°34'5"N, 103°45'11"E  |
|                        | 2      | 18     | 34     | 50     | 400         | 29°35'2"N, 103°44'25"E  |
|                        | 3      | 19     | 35     | 51     | 360         | 29°35'11"N, 103°44'15"E |
|                        | 4      | 20     | 36     | 52     | 410         | 29°34'24"N, 103°44'55"E |
| returned farmland soil | 5      | 21     | 37     | 53     | 390         | 29°35'4"N, 103°44'25"E  |
|                        | 6      | 22     | 38     | 54     | 380         | 29°34'38"N, 103°44'24"E |
|                        | 7      | 23     | 39     | 55     | 410         | 29°35'25"N, 103°42'42"E |
| Forestland soil        | 8      | 24     | 40     | 56     | 370         | 29°34'3"N, 103°44'31"E  |
|                        | 9      | 25     | 41     | 57     | 390         | 29°34'23"N, 103°45'4"E  |
|                        | 10     | 26     | 42     | 58     | 400         | 29°35'40"N, 103°43'29"E |
|                        | 11     | 27     | 43     | 59     | 400         | 29°34'22"N, 103°44'53"E |
| Wetland soil           | 12     | 28     | 44     | 60     | 380         | 29°34'9"N, 103°44'36"E  |
|                        | 13     | 29     | 45     | 61     | 370         | 29°35'51"N, 103°43'33"E |
|                        | 14     | 30     | 46     | 62     | 380         | 29°34'45"N, 103°42'41"E |
|                        | 15     | 31     | 47     | 63     | 370         | 29°34'8"N, 103°44'37"E  |
|                        | 16     | 32     | 48     | 64     | 380         | 29°34'8"N, 103°44'7"E   |

\* indicates the sample number, there are 64 samples in total.

**Table S2.** Primers and PCR conditions.

| Primer            | Sequence(5'-3')         | Amplicon<br>size<br>(bp) | Annealing<br>temperature<br>(°C) | Reference |
|-------------------|-------------------------|--------------------------|----------------------------------|-----------|
| <i>acd320f</i>    | CGGTCCAGACTCCTACGGGA    | 112                      | 55                               | [68]      |
| <i>acd432r</i>    | GACAGGGTTTTACAGTCCGAAGA |                          |                                  |           |
| <i>acm342f</i>    | GCAATGGGGGAAACCCCTGAC   | 115                      | 58                               |           |
| <i>acm439r</i>    | ACCGTCAATTTTCGTCCCTGC   |                          |                                  |           |
| <i>hzsA_1597F</i> | WTYGGKTATCARTATGTAG     | 260                      | 60                               | [69]      |
| <i>hzsA_1857R</i> | AAABGGYGAATCATARTGGC    |                          |                                  |           |
| <i>Geo494F</i>    | AGGAAGCACCGGCTAACTCC    | 331                      | 55                               | [70]      |
| <i>Geo825R</i>    | TACCCGCAC ACCTAGT       |                          |                                  |           |
| 16S-1F            | CGAAGGCACCAATCCATCT     | 233                      | 60                               | [71]      |
| 16S 2R            | GTAGTCCACGCCGTAAACGA    |                          |                                  |           |

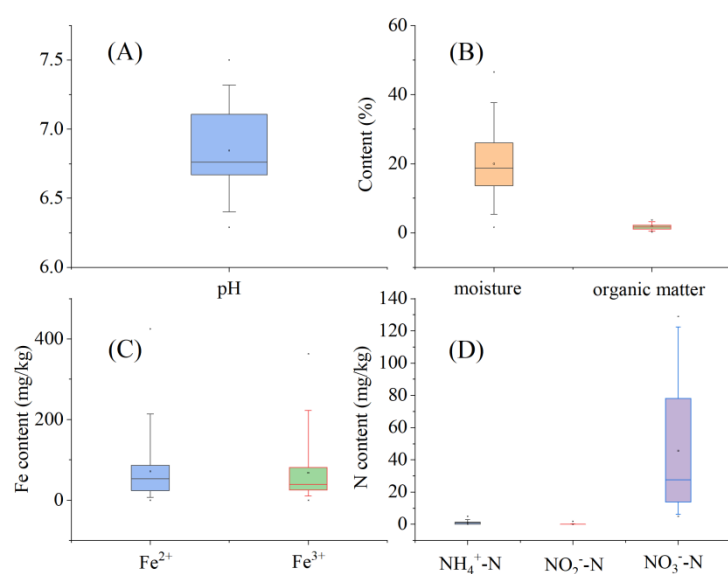

**Figure S1.** Box charts of soil pH (A), moisture content, OM content (B),  $\text{Fe}^{2+}$ ,  $\text{Fe}^{3+}$  (C), and  $\text{NH}_4^+\text{-N}$ ,  $\text{NO}_2^-\text{-N}$ , and  $\text{NO}_3^-\text{-N}$  (D) of all 64 samples.

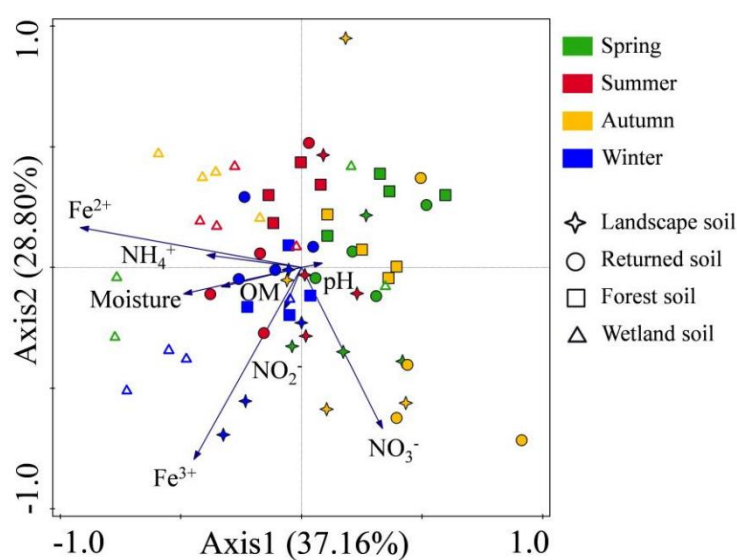

**Figure S2.** Principal component analysis (PCA) of soil physicochemical factors (blue hollow arrows). Note: season is distinguished by color while soil type is distinguished by shape.

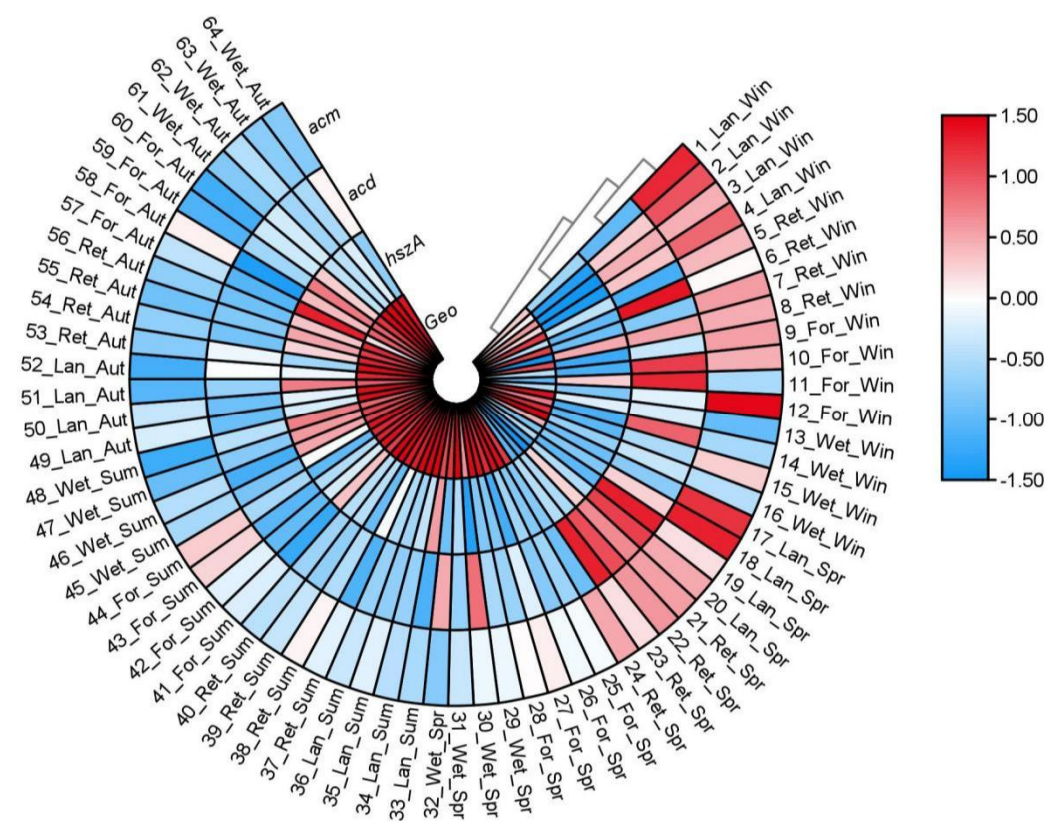

**Figure S3.** Heatmap of relative target gene abundance in soil samples. Note: data are presented in log10 format.

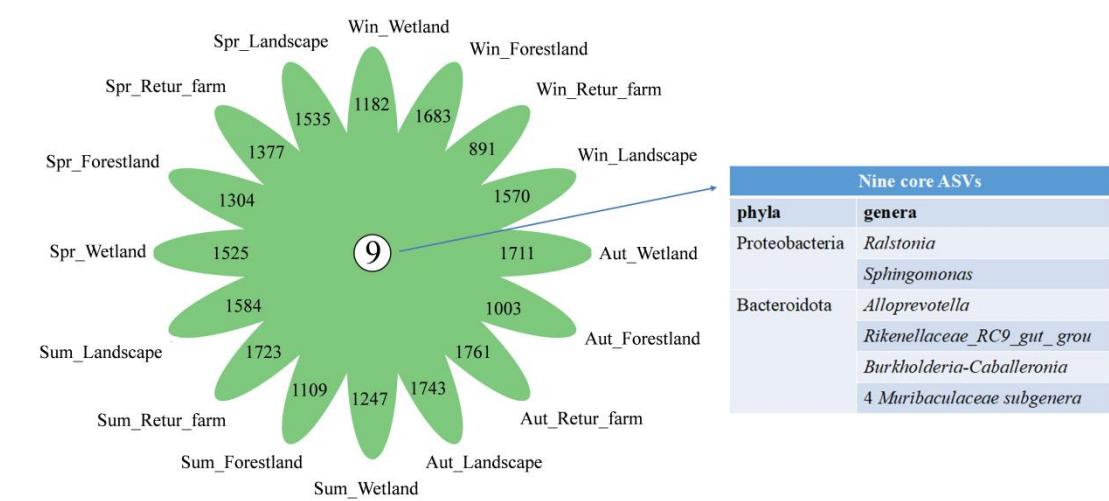

Figure S4. Flower plot of soil ASV and nine core ASVs.

**Table S3.** Effects of season and habitat on indices of microbial richness and biodiversity according to two-way ANOVA. Note: "+" indicates the significant influence of each factor on the indices or clear interaction between season and habitat; "-" indicates the non-significant influence of each factor on the indices or unclear interaction between season and habitat.

| Factor                     | Chao1 | Shannon | Simpson | ASV |
|----------------------------|-------|---------|---------|-----|
| Season                     | +     | +       | +       | +   |
| Habitat                    | +     | +       | +       | +   |
| Season–habitat interaction | +     | +       | +       | +   |

**Table S4.** Coefficients of correlation among target genes, top 30 bacterial genera, and other putative Feammox, iron-reducing, and anammox bacteria.

| Gene           | Microbe                      | Microbe             | R            | p               |
|----------------|------------------------------|---------------------|--------------|-----------------|
| <i>acd_re</i>  | <i>Flavobacterium</i>        | -                   | 0.606        | 0.013           |
| <i>acd_re</i>  | <i>Thermomonas</i>           | -                   | 0.828        | 7.39E-05        |
| <i>acm_re</i>  | <i>RCP2-54</i>               | -                   | -0.650       | 0.006           |
| <i>Geo_re</i>  | <i>Subgroup_2</i>            | -                   | 0.753        | 0.001           |
| <i>Geo_re</i>  | <i>Bryobacter</i>            | -                   | 0.633        | 0.008           |
| <i>hszA_re</i> | <i>Candidatus_Solibacter</i> | -                   | <b>0.902</b> | <b>1.83E-06</b> |
| -              | <i>Nitrospira</i>            | <i>Sphingomonas</i> | -0.625       | 0.010           |
| -              | <i>Nitrospira</i>            | <i>MND1</i>         | 0.638        | 0.008           |
| -              | <i>Dongia</i>                | <i>MND1</i>         | 0.692        | 0.003           |
| -              | <i>Bryobacter</i>            | <i>TRA3-20</i>      | -0.643       | 0.007           |
| -              | <i>Subgroup_22</i>           | <i>MND1</i>         | 0.625        | 0.010           |
| -              | <i>TRA3-20</i>               | <i>MND1</i>         | 0.711        | 0.002           |
| -              | <i>TRA3-20</i>               | <i>NB1-j</i>        | 0.776        | 4.07E-04        |
| -              | <i>Nitrospira</i>            | <i>NB1-j</i>        | 0.650        | 0.006           |
| -              | <i>Subgroup_22</i>           | <i>NB1-j</i>        | 0.954        | 9.87E-09        |
| -              | <i>MND1</i>                  | <i>Haliangium</i>   | 0.604        | 0.013           |
| -              | <i>Subgroup_22</i>           | <i>Haliangium</i>   | 0.630        | 0.009           |
| -              | <i>Rhodanobacter</i>         | <i>Pseudomonas</i>  | 0.696        | 0.003           |
| -              | <i>MND1</i>                  | <i>RCP2-54</i>      | 0.768        | 0.001           |
| -              | <i>TRA3-20</i>               | <i>RCP2-54</i>      | 0.682        | 0.004           |
| -              | <i>Nitrospira</i>            | <i>RCP2-54</i>      | 0.823        | 9.11E-05        |
| -              | <i>Dongia</i>                | <i>RCP2-54</i>      | 0.678        | 0.004           |
| -              | <i>Subgroup_22</i>           | <i>RCP2-54</i>      | 0.683        | 0.004           |
| -              | <i>NB1-j</i>                 | <i>RCP2-54</i>      | 0.770        | 0.000           |
| -              | <i>Sphingomonas</i>          | <i>IMCC26256</i>    | 0.641        | 0.008           |
| -              | <i>Bryobacter</i>            | <i>IMCC26256</i>    | 0.843        | 4.06E-05        |
| -              | <i>Arenimonas</i>            | <i>Ramlibacter</i>  | 0.773        | 4.42E-04        |
| -              | <i>Massilia</i>              | <i>Ramlibacter</i>  | 0.715        | 0.002           |

|   |                              |                              |              |                 |
|---|------------------------------|------------------------------|--------------|-----------------|
| - | Subgroup_10                  | Ellin6055                    | 0.690        | 0.003           |
| - | Subgroup_2                   | Candidatus_Solibacter        | 0.671        | 0.004           |
| - | Gemmatimonas                 | Candidatus_Solibacter        | 0.744        | 0.001           |
| - | Gemmatimonas                 | Acidibacter                  | 0.658        | 0.006           |
| - | Candidatus_Solibacter        | Acidibacter                  | 0.712        | 0.002           |
| - | Sphingomonas                 | OLB12                        | -0.651       | 0.006           |
| - | Gemmatimonas                 | Acidimicrobiaceae family     | 0.681        | 0.004           |
| - | Flavobacterium               | Acidovorax                   | <b>0.974</b> | <b>1.79E-10</b> |
| - | OLB12                        | Acidovorax                   | 0.591        | 0.016           |
| - | Sphingomonas                 | Anaeromyxobacter             | -0.660       | 0.005           |
| - | OLB12                        | Anaeromyxobacter             | 0.617        | 0.011           |
| - | Acidimicrobiaceae family     | Bacillus                     | 0.718        | 0.002           |
| - | Bacillaceae family           | Bacillus                     | 0.777        | 3.98E-04        |
| - | Gemmatimonas                 | Bradyrhizobium               | 0.663        | 0.005           |
| - | Acidovorax                   | Clostridiaceae family        | 0.616        | 0.011           |
| - | SC-I-84                      | Clostridium_sensu_stricto_1  | -0.643       | 0.007           |
| - | Clostridiaceae family        | Clostridium_sensu_stricto_1  | <b>0.978</b> | <b>5.52E-11</b> |
| - | Rhizobacter                  | Clostridium_sensu_stricto_10 | 0.642        | 0.007           |
| - | Flavobacterium               | Clostridium_sensu_stricto_12 | 0.839        | 4.95E-05        |
| - | Acidovorax                   | Clostridium_sensu_stricto_12 | 0.778        | 3.84E-04        |
| - | Flavobacterium               | Crenothrix                   | 0.810        | 1.41E-04        |
| - | OLB12                        | Crenothrix                   | <b>0.913</b> | <b>8.29E-07</b> |
| - | Acidovorax                   | Crenothrix                   | 0.834        | 6.04E-05        |
| - | Anaeromyxobacter             | Crenothrix                   | 0.608        | 0.012           |
| - | Clostridium_sensu_stricto_12 | Crenothrix                   | 0.710        | 0.002           |
| - | Sphingomonas                 | Dechloromonas                | -0.627       | 0.009           |
| - | OLB12                        | Dechloromonas                | <b>0.969</b> | <b>6.37E-10</b> |
| - | Anaeromyxobacter             | Dechloromonas                | 0.649        | 0.007           |
| - | Clostridium_sensu_stricto_12 | Dechloromonas                | 0.503        | 0.047           |
| - | Crenothrix                   | Dechloromonas                | <b>0.911</b> | <b>9.67E-07</b> |
| - | Sphingomonas                 | Gallionellaceae family       | -0.727       | 0.001           |
| - | OLB12                        | Gallionellaceae family       | 0.607        | 0.013           |
| - | Anaeromyxobacter             | Gallionellaceae family       | <b>0.925</b> | <b>3.04E-07</b> |
| - | Dechloromonas                | Gallionellaceae family       | 0.652        | 0.006           |
| - | Flavobacterium               | Geobacter                    | 0.771        | 4.71E-04        |
| - | OLB12                        | Geobacter                    | <b>0.926</b> | <b>2.67E-07</b> |
| - | Acidovorax                   | Geobacter                    | 0.795        | 2.29E-04        |
| - | Anaeromyxobacter             | Geobacter                    | 0.645        | 0.007           |
| - | Clostridium_sensu_stricto_12 | Geobacter                    | 0.671        | 0.004           |
| - | Crenothrix                   | Geobacter                    | <b>0.986</b> | <b>2.48E-12</b> |
| - | Dechloromonas                | Geobacter                    | <b>0.947</b> | <b>2.58E-08</b> |
| - | Gallionellaceae family       | Geobacter                    | 0.648        | 0.007           |

|   |                                     |                              |              |                 |
|---|-------------------------------------|------------------------------|--------------|-----------------|
| - | <i>Acinetobacter</i>                | <i>Geobacteraceae</i> family | 0.616        | 0.011           |
| - | <i>Anaeromyxobacter</i>             | <i>Geobacteraceae</i> family | <b>0.979</b> | <b>4.38E-11</b> |
| - | <i>Gallionellaceae</i> family       | <i>Geobacteraceae</i> family | 0.878        | 7.59E-06        |
| - | <i>Geobacter</i>                    | <i>Geobacteraceae</i> family | 0.525        | 0.037           |
| - | <i>Dechloromonas</i>                | <i>Ignavibacterium</i>       | 0.617        | 0.011           |
| - | <i>Desulfovibrio</i>                | <i>Ignavibacterium</i>       | 0.815        | 1.21E-04        |
| - | <i>Sphingomonas</i>                 | <i>Methylocystis</i>         | -0.663       | 0.005           |
| - | <i>OLB12</i>                        | <i>Methylocystis</i>         | <b>0.959</b> | <b>4.80E-09</b> |
| - | <i>Crenothrix</i>                   | <i>Methylocystis</i>         | 0.864        | 1.60E-05        |
| - | <i>Dechloromonas</i>                | <i>Methylocystis</i>         | <b>0.956</b> | <b>7.21E-09</b> |
| - | <i>Gallionellaceae</i> family       | <i>Methylocystis</i>         | 0.637        | 0.008           |
| - | <i>Geobacter</i>                    | <i>Methylocystis</i>         | <b>0.907</b> | <b>1.23E-06</b> |
| - | <i>Anaeromyxobacter</i>             | <i>Rhodobacter</i>           | 0.744        | 0.001           |
| - | <i>Geobacteraceae</i> family        | <i>Rhodobacter</i>           | 0.791        | 2.60E-04        |
| - | <i>Rhodanobacter</i>                | <i>Rhodopseudomonas</i>      | 0.674        | 0.004           |
| - | <i>Bradyrhizobium</i>               | <i>Rhodopseudomonas</i>      | 0.608        | 0.012           |
| - | <i>SC-I-84</i>                      | <i>SM1A02</i>                | 0.707        | 0.002           |
| - | <i>Flavobacterium</i>               | <i>Thermomonas</i>           | <b>0.925</b> | <b>2.85E-07</b> |
| - | <i>Acidovorax</i>                   | <i>Thermomonas</i>           | <b>0.912</b> | <b>8.91E-07</b> |
| - | <i>Clostridium_sensu_stricto_12</i> | <i>Thermomonas</i>           | 0.678        | 0.004           |
| - | <i>Crenothrix</i>                   | <i>Thermomonas</i>           | 0.792        | 2.53E-04        |
| - | <i>Geobacter</i>                    | <i>Thermomonas</i>           | 0.751        | 0.001           |
| - | <i>Sphingomonas</i>                 | <i>Thiobacillus</i>          | -0.632       | 0.009           |
| - | <i>OLB12</i>                        | <i>Thiobacillus</i>          | 0.739        | 0.001           |
| - | <i>Anaeromyxobacter</i>             | <i>Thiobacillus</i>          | 0.760        | 0.001           |
| - | <i>Crenothrix</i>                   | <i>Thiobacillus</i>          | 0.603        | 0.013           |
| - | <i>Dechloromonas</i>                | <i>Thiobacillus</i>          | 0.760        | 0.001           |
| - | <i>Gallionellaceae</i> family       | <i>Thiobacillus</i>          | 0.841        | 4.40E-05        |
| - | <i>Geobacter</i>                    | <i>Thiobacillus</i>          | 0.686        | 0.003           |
| - | <i>Geobacteraceae</i> family        | <i>Thiobacillus</i>          | 0.699        | 0.003           |
| - | <i>Ignavibacterium</i>              | <i>Thiobacillus</i>          | 0.821        | 9.69E-05        |
| - | <i>Methylocystis</i>                | <i>Thiobacillus</i>          | 0.783        | 3.40E-04        |
